1 **GLOBAL MISTRANSLATION FACILITATES SAMPLING OF BENEFICIAL MUTATIONS**  
2 **UNDER STRESS**

3

4 Laasya Samhita\*, Parth K Raval and Deepa Agashe\*

5 National Centre for Biological Sciences, Tata Institute of Fundamental research, Bangalore, India

6

7 \*Correspondence:

8 Laasya Samhita (laasyas@ncbs.res.in, laasya2@gmail.com)

9 Deepa Agashe (dagashe@ncbs.res.in)

10

11 **ABSTRACT**

12 Mistranslation is typically deleterious, but can sometimes be beneficial. Although a specific  
13 mistranslated protein can confer a short-term benefit in a particular environment, the prevalence of high  
14 global mistranslation rates remains puzzling given the large overall cost. Here, we show that generalized  
15 mistranslation enhances early *E. coli* survival under various forms of DNA damage, because it leads to  
16 early activation of the DNA damage-induced SOS response. Mistranslating cells therefore maintain  
17 larger populations, facilitating later sampling of critical beneficial mutations. Thus, under DNA  
18 damage, both basal and induced mistranslation (through genetic or environmental means) increase the  
19 number of genetically resistant and phenotypically persistent cells. Surprisingly, mistranslation also  
20 increases survival at high temperature. This wide-ranging stress resistance relies on Lon protease, which  
21 is revealed as a key effector that induces the SOS response in addition to alleviating proteotoxic stress.  
22 The new links between error-prone protein synthesis, DNA damage, and generalised stress resistance  
23 indicate surprising coordination between intracellular stress responses, and suggest a novel hypothesis  
24 to explain high global mistranslation rates.

25

26 **Keywords**

27 Mistranslation, SOS response, stress response, ciprofloxacin resistance, Lon protease

28

29 **INTRODUCTION**

30

31 The rate of protein mistranslation is amongst the highest known error rates in cellular biosynthetic  
32 processes, ranging from 1 in 10,000 to 1 in 100 mis-incorporated amino acids in *E.coli*<sup>1,2</sup>. As a result,  
33 10 to 15% of all proteins in an actively growing *E.coli* cell are likely to carry at least one mis-  
34 incorporated amino acid<sup>3,4</sup>, implying a high tolerance for mistakes. This is puzzling because  
35 mistranslation is thought to be deleterious, and cells have evolved several proofreading mechanisms to  
36 minimise error reviewed in<sup>5</sup>. Counterintuitively, a body of work showing that cells elevate basal  
37 mistranslation levels under specific stresses reviewed in<sup>6,7</sup> suggests that high mistranslation may also  
38 evolve under positive selection. This is further supported by multiple examples of the selective  
39 advantage of specific mistranslated proteins. For instance, in *Mycobacterium smegmatis*, increasing  
40 specific amino acid substitutions at glutamate and aspartate tRNAs generates a mixed population of  
41 wild type and mistranslated RNA polymerase molecules<sup>8</sup>. The resulting amino acid substitutions inhibit  
42 RNA polymerase activity and increase resistance to rifampicin (an antibiotic that targets RNA  
43 polymerase). However, it remains unknown whether selection favouring specific mistranslated proteins  
44 in distinct environments is sufficient to drive increased global mistranslation rates.

45

46 Alternatively, selection may directly favour high global mistranslation rates by generating a “statistical  
47 proteome” – a bet-hedging strategy where a few cells with specific mistranslated proteins can survive  
48 a given environmental stress<sup>9,10</sup>. The only natural (non-manipulated) example of such general  
49 proteome-wide beneficial mistranslation comes from fascinating work on mis-methionylation in *E.coli*.  
50 In anaerobic environments or upon exposure to low concentrations of chloramphenicol, the methionyl  
51 tRNA synthetase enzyme loses its succinyl modifications, reducing enzyme fidelity<sup>11</sup>. As a result, the  
52 enzyme amino-acylates methionine onto non-cognate tRNAs, causing ‘mis-methionylation’<sup>12</sup> and  
53 increasing survival under anaerobic and antibiotic stress. However, we do not yet know why the  
54 succinyl modifications are altered under these specific stresses, nor the underlying mechanism. More  
55 generally, increasing overall mistranslation levels is typically deleterious, reviewed in<sup>7,13</sup>, suggesting a  
56 narrow range of error rates in which the potential benefit of a few specific mistranslated proteins could  
57 outweigh the larger overall cost of mistranslated proteins.

58

59 Here, we propose a new hypothesis that bypasses the need for specific mistranslated proteins, making  
60 a broad fitness benefit of global mistranslation plausible. We demonstrate a mechanism by which  
61 generalized mistranslation increases resistance to multiple stresses in *E. coli*. To mimic natural cellular  
62 responses to environmental stress, we initiated our study using a strain with genetically depleted  
63 initiator tRNA (tRNA<sub>i</sub>) content (henceforth “Mutant”, carrying only one of four wild type “WT” tRNA<sub>i</sub>  
64 genes<sup>14</sup>). As central players in translation, cellular tRNA levels have a major impact on mistranslation  
65<sup>15,16</sup>, and are rapidly altered in response to environmental change<sup>17-19</sup>. Initiator tRNA (tRNA<sub>i</sub>) levels

66 are especially interesting because translation initiation is a rate limiting step<sup>20</sup>, and tRNAi levels change  
67 under various stresses. For instance, in *E.coli*, amino acid starvation is accompanied by a transcriptional  
68 tRNAi downregulation during the stringent response<sup>21</sup>, while mammalian cells reduce tRNAi levels on  
69 exposure to stressors such as the toxin VapC<sup>22</sup> and high temperature<sup>23</sup>. Depletion of tRNAi causes at  
70 least one kind of mistranslation, allowing promiscuous non-AUG initiation by elongator tRNAs<sup>16,22</sup>.  
71 We therefore tested whether mistranslation resulting from tRNAi depletion in the Mutant leads to a  
72 general survival advantage.

73

74 We first carried out a Biolog screen<sup>24</sup> comparing WT and Mutant growth across a range of  
75 environments, including 48 antibiotics with various modes of action. The Mutant showed higher growth  
76 in the presence of Novobiocin (Fig. S1), a fluoroquinolone antibiotic that inhibits DNA gyrase and  
77 causes DNA damage. Further work showed that inducing mistranslation via multiple mechanisms  
78 conferred protection against several kinds of DNA damage, via induction of the well-studied bacterial  
79 SOS response. Increased mistranslation brings cells closer to the intracellular molecular threshold for  
80 SOS induction, such that mistranslating cells sense and repair DNA damage sooner than the wild type.  
81 The resulting increase in early survival facilitates the eventual emergence of genetic resistance as well  
82 as phenotypic persistence under antibiotic stress. Interestingly, the mistranslation-induced SOS  
83 response is also beneficial in other conditions, increasing persistence and survival at elevated  
84 temperature. Thus, we have uncovered a general, novel link between mistranslation and DNA damage  
85 that integrates two major cellular pathways and suggests a new hypothesis for the evolution of  
86 mistranslation rates.

87

## 88 **RESULTS**

89

### 90 **Mistranslation increases resistance to DNA damage by enhancing early cell survival**

91 Compared to WT, the mistranslating Mutant with depleted tRNAi showed higher survival under DNA  
92 damage of various kinds, induced by exposure to UV radiation (base dimerization), hydrogen peroxide  
93 (base oxidation) or the antibiotic ciprofloxacin ('Cip', a more potent DNA gyrase inhibitor than  
94 Novobiocin, that causes double stranded DNA breaks) (Fig. 1a–c). Higher Cip resistance in the Mutant  
95 did not arise as a by-product of slower growth (in LB, the Mutant has a doubling time of ~1.0 h  
96 compared to ~0.6 h for WT; Fig. S2a): WT Cip resistance did not increase when grown in glycerol,  
97 where it has a 5-fold lower doubling time (Fig. S2b). These results were intriguing because  
98 mistranslation has no known connection with DNA damage or its repair. To determine the mechanisms  
99 underlying this connection, we focused on Cip resistance.

100

101 Whole genome sequencing showed that each Cip-resistant (Cip<sup>R</sup>) colony of WT and Mutant (after 24 h  
102 on Cip plates) had a single mutation within the well-known QRDR (Quinolone Resistance Determining

103 Region) of the *gyrA* gene (Table S1). Thus, while WT and Mutant cells acquired identical beneficial  
104 mutations, the Mutant was more likely to sample them. However, WT and Mutant had similar basal  
105 mutation frequency (Fig. S3), suggesting that higher mutation rate could not explain higher Cip  
106 resistance in the Mutant. Instead, we found that the Mutant had greater early survival after Cip exposure  
107 (after 2 h; Fig. 1d), and cells sampled at this point did not have any QRDR mutations. Therefore, this  
108 early survival was not due to genetic resistance, but implies a form of tolerance. The ~5 fold difference  
109 in population size meant that a higher proportion of cells in Mutant cultures could sample *gyrA*  
110 mutations, ultimately increasing Cip resistance. Together, these results suggested that mistranslation  
111 indirectly enhanced Cip resistance by increasing early survival (Fig. 1e).

112

113 To test the generality of this result, we manipulated mistranslation levels by (a) reducing global  
114 mistranslation via hyper-accurate ribosomes (Methods; Fig. S4) and (b) increasing WT mistranslation  
115 by adding the non-proteinogenic amino acids canavanine or norleucine to the growth medium<sup>25,26</sup>.  
116 Increasing mistranslation rates consistently increased early survival (Fig. 1d) and Cip resistance in WT  
117 (Fig. 1f), whereas suppressing basal mistranslation decreased early survival and Cip resistance in both  
118 WT and Mutant (Fig. 1d and 1f). We next focused on understanding the mechanistic basis of this effect.

119

### 120 **Mistranslation mediates ciprofloxacin resistance via the SOS response**

121 In response to DNA damage, bacterial cells induce the SOS response, which controls the expression of  
122 several DNA repair pathways<sup>27</sup>. Briefly, DNA damage generates single stranded DNA that binds to the  
123 protein RecA. Activated RecA stimulates cleavage of LexA (a repressor), which in turn induces the  
124 SOS response, de-repressing several DNA repair genes (Fig. 2a). When we blocked SOS induction by  
125 replacing the WT *lexA* allele with a non-degradable allele *lexA3*<sup>28</sup> and challenged cultures with Cip,  
126 both WT and Mutant showed low early survival (Fig. S5) and negligible Cip resistance (Fig. 2b), as  
127 expected in the absence of an intact DNA repair response. Thus, mistranslation-induced increase in  
128 tolerance leading to Cip resistance depends on the SOS response.

129

130 The SOS response has two opposing aspects: rapid DNA repair, and increased mutagenesis due to the  
131 activation of error-prone polymerases. The latter temporarily elevates mutation rate, increasing the  
132 supply of beneficial mutations<sup>29</sup>. However, as mentioned above, WT and Mutant had similar basal  
133 mutation frequencies (Fig. S3). Therefore, we reasoned that the increased early survival of  
134 mistranslating strains must be aided by faster or more efficient repair and recombination. To test this,  
135 we deleted RecN – a key member of the SOS-linked recombination mediated repair pathway<sup>30</sup>. The  
136 deletion led to decreased early survival upon Cip exposure (Fig. S6) and a complete loss of Cip  
137 resistance (Fig. 2b), indicating that repair and recombination functions indeed underlie the increased  
138 Cip resistance observed in the mistranslating Mutant.

139

140 **Mistranslation enhances Cip resistance by allowing faster induction of the SOS response**

141 Since both WT and Mutant rely on the SOS response for Cip resistance, the ~5-fold greater survival of  
142 the Mutant (Fig. 1d) continued to be a puzzle. We hypothesized that the survival advantage arose from  
143 differential induction of SOS due to mistranslation, allowing rapid DNA repair. Consistent with this  
144 hypothesis, greater mistranslation was associated with slightly (though not significantly) higher basal  
145 RecA levels across multiple experimental blocks (Fig. 2c). These results suggest that even in the  
146 absence of DNA damage, RecA was already elevated in mistranslating strains, positioning the cell  
147 closer to the SOS induction threshold (Fig. 2a and 2f). To test this, we induced the SOS response in WT  
148 and Mutant and monitored the time course of LexA degradation. The Mutant degraded LexA within  
149 10–20 minutes of SOS induction, while the WT took an additional 10–20 minutes (Fig. 2e and Fig. S7).  
150 Similarly, LexA was degraded at lower concentrations of Cip in the Mutant (Fig. S8). Note that the  
151 Mutant is not already ‘stressed’ and has similar basal LexA levels to the WT (Fig. S8); it is only upon  
152 encountering DNA damage that LexA starts degrading.

153

154 Together, these observations suggest that in mistranslating strains, (i) LexA is degraded faster upon  
155 encountering the DNA damaging stress, and (ii) LexA is degraded at a lower magnitude of the stress  
156 (Fig. 2f). Thus, we demonstrate a direct causal relationship between mistranslation, induction of the  
157 SOS response, and enhanced survival under Cip.

158

159 **Mistranslation induces the SOS response via Lon protease**

160 In our experiments, we induced mistranslation in distinct ways, and consistently observed increased  
161 survival under DNA damage. Canavanine and norleucine respectively replace arginine and leucine in  
162 the proteome, whereas tRNAi depletion causes mis-initiation with elongator tRNAs. The parallel  
163 outcomes from these diverse modes of mistranslation suggested a general mechanistic link between  
164 mistranslation and SOS response. Based on prior studies, we suspected that Lon – a key protease across  
165 eubacteria – may represent such a link. In mistranslating *E.coli* cells, Lon alleviates the associated  
166 deleterious effects by degrading aggregated and non-functional proteins<sup>3</sup>. In *Pseudomonas*, Lon is  
167 essential for RecA accumulation and induction of the SOS response, and is suggested to degrade RecA  
168 repressors such as RecX and RdgC<sup>31</sup>.

169

170 We therefore hypothesized that our mistranslating strains may have higher amounts of Lon, in turn  
171 accumulating RecA and bringing cells physiologically closer to the threshold for SOS induction.  
172 Because Lon is part of the *E. coli* heat shock regulon<sup>32</sup>, we also suspected a general increase in the  
173 heat shock response. Indeed, mistranslating cells had higher levels of Lon protease (Fig. 3a), as well as  
174 the heat shock transcription factor sigma 32 (Fig. S9). For technical reasons, we were unable to knock  
175 out Lon in our wild type strain KL16. Hence, we deleted Lon in *E. coli* MG1655. While MG1655 had  
176 comparable ciprofloxacin resistance to our WT (KL16; Fig. S10), deleting Lon decreased Cip resistance

177 (Fig. 3b) and increased LexA levels in SOS-induced cells (Fig. 3c). Conversely, over-expressing Lon  
178 enhanced early survival (Fig. S11) and resistance to Cip (Fig. 3b), and reduced LexA levels in both WT  
179 and Mutant upon SOS induction (Fig. 3c). Over-expressing Lon also elevated basal RecA levels (in the  
180 absence of any DNA damage), further supporting our hypothesis (Fig. S12). Finally, since Lon is part  
181 of the heat shock regulon, we predicted that prior exposure to high temperature should induce Lon and  
182 increase resistance to DNA damage. True to expectation, cells grown at 42°C for three hours had higher  
183 Cip resistance (Fig. 4a). Together, these results strongly support a key role for Lon in mediating Cip  
184 resistance by inducing the SOS response.

185

### 186 **Mistranslation-induced SOS response enhances survival in other stresses**

187 As mentioned above, Lon is part of the heat shock regulon; hence we tested whether mistranslation also  
188 increased survival under high temperature. As predicted, we found that the Mutant had greater survival  
189 at high temperature, especially in the stationary phase of growth (after 12 hours; Fig 4b). We also  
190 observed this growth advantage in WT cells treated with norleucine and canavanine, although  
191 canavanine results were variable (Fig. S13). Importantly, Lon alone could not explain the greater  
192 survival at high temperature: it required both mistranslation and a functional SOS response (Fig. 5b);  
193 Lon levels at 42°C were comparable across WT and Mutant (Fig. S14); and LexA was degraded in the  
194 Mutant but not in the WT (Fig. S15). Interestingly, RecN is important for high temperature survival of  
195 both WT and Mutant, suggesting that survival is influenced by functional DNA repair (Fig. S16). The  
196 clear dependence of the survival advantage on SOS induction suggests cross-talk between  
197 mistranslation, the heat shock response and SOS induction.

198

199 The SOS response controls over 40 genes in *E.coli*, including five toxin-antitoxin modules. Of these,  
200 the TisA/TisB module induces persistence (a state of metabolic dormancy leading to increased tolerance  
201 to antibiotics and other drugs) by reducing the proton motive force across the cell membrane<sup>33</sup>. We  
202 therefore tested whether inducing mistranslation increases persistence following exposure to Cip and  
203 other antibiotics. We defined the number of persisters as the number of colony forming units that survive  
204 exposure to a lethal antibiotic concentration (Cip 200), but do not divide actively in its presence. We  
205 found that mistranslation increased persistence to Cip (Fig. 4c). In yeast, DNA damage also induces  
206 persisters that carry more mutations<sup>34</sup>, as expected under an elevated SOS response leading to  
207 mutagenesis. However, in our case – true to the conventional understanding of persistence – we did not  
208 find any mutations when we sequenced whole genomes of WT or Mutant persister cells, as well as their  
209 hyper-accurate counterparts.

210

211 Our results thus show that mistranslation-induced early activation of the SOS response is responsible  
212 for multiple stress resistance phenotypes. We suggest a model whereby mistranslation of various kinds

213 increases Lon protease levels, triggering an early induction of the SOS response that enhances cell  
214 survival not only under DNA damage, but also under other stresses (Fig. 5).

215

## 216 **DISCUSSION**

217

218 High global translation error rates have remained an enduring puzzle, given the large overall costs of  
219 generalized mistranslation compared to the benefits of generating specific mistranslated proteins in  
220 particular environments. In particular, this problem has mired the hypothesis that mistranslation rates  
221 may evolve under positive selection. Here, we diminish this barrier by demonstrating that basal as well  
222 as induced non-specific mistranslation enhances early survival under DNA damage by rapidly inducing  
223 the SOS response, making a larger pool of cells available for subsequent genetic change. We further  
224 show that this effect is mediated by increased levels of a key protease that deals with aberrant proteins  
225 as well as several important regulatory enzymes. Since survival does not rely on the chance generation  
226 of specific mistranslated proteins, cells effectively bypass the deleterious load of high mistranslation,  
227 and instead use it to trigger stress responses and alleviate damage to cellular components. Most stresses  
228 that are commonly encountered by bacteria (oxidative stress, high temperature, radiation, starvation)  
229 induce mistranslation (through damage to proteins), DNA damage, or both. Hence, it seems fitting that  
230 these two phenomena should be linked, and should operate through a common effector molecule.

231

232 Although prior work had suggested a link between mistranslation and SOS response in ageing bacterial  
233 colonies<sup>35</sup>, the underlying mechanism and generality of the proposed link remained unknown. In  
234 contrast to the known mutagenic impact of SOS induction (generating “hopeful monsters”), we  
235 demonstrate that mistranslation is generally beneficial under stress because it enhances the rapid repair  
236 modules controlled by the SOS response. Our proposed model (Fig. 5) thus lends support to the  
237 hypothesis that global mistranslation levels could evolve under positive selection. More broadly, our  
238 results imply that generalized non-genetic changes can facilitate subsequent genetic adaptation by  
239 increasing short-term survival. This has been an attractive hypothesis with limited and protein-specific  
240 prior support. In *S. cerevisiae*, ribosomal frameshifting alters localization of a specific protein, a  
241 phenotype that is then fixed by genetic mutations in a few generations<sup>36</sup>. Similarly, changes in Hsp90  
242 levels in *Candida albicans*<sup>37</sup> and at least one phenotype conferred by the prion PSI+ in wild yeasts can  
243 be stabilised over evolutionary time<sup>38</sup>. Our results generalize these effects, providing clear evidence  
244 that non-directed phenotypic changes can facilitate improved stress resistance by enhancing the  
245 subsequent sampling of beneficial mutations.

246

247 Our work also helps to synthesize a diverse body of prior results into a cohesive framework. It is well  
248 known that mistranslation may lead to misfolding and protein aggregation, which is typically  
249 deleterious reviewed in<sup>39</sup>. However, a recent study showed that cells carrying intracellular protein



250 aggregates were more stress-resistant<sup>40</sup>. Interestingly, these cells had upregulated chaperones such as  
251 DnaK and proteases such as ClpP, suggesting that protein aggregation can also precipitate stress  
252 resistance. Prior work also shows that Lon is required to alleviate the toxic effects of mistranslation<sup>3</sup>;  
253 but except for one study in *S. cerevisiae*<sup>41</sup>, there was no evidence linking the heat shock response with  
254 mistranslation. We show that the heat shock response is activated by general mistranslation (Fig. S9),  
255 leading to increased Lon levels. Our model could also explain the puzzling observation that Lon  
256 protease function determines sensitivity to high concentrations of quinolone antibiotics (which target  
257 DNA gyrase, with no direct connection to Lon) such as nalidixic acid<sup>42</sup> and levofloxacin<sup>43</sup>. Our results  
258 show that impairing Lon hinders cells' ability to rapidly induce the SOS response and repair damaged  
259 DNA. The central role of Lon in bridging mistranslation and the SOS response is also supported by  
260 previously observed links between the heat shock response and the SOS response. For example, in  
261 *Listeria monocytogenes*, heat shock directly triggers the SOS response<sup>44</sup>. In *E. coli*, the heat shock  
262 chaperone GroE also induces expression of the mutator polymerase UmuD, hitherto thought to be  
263 regulated only via the SOS response<sup>45</sup>. Finally, when exposed to levofloxacin, *E. coli* cells express both  
264 the SOS response and heat shock genes<sup>43</sup>. These results corroborate our observation that mistranslation  
265 and SOS activation together increase heat resistance, though we do not yet know precisely how this  
266 phenotype is regulated. Altogether, we suggest that Lon acts as a key molecule that coordinates several  
267 aspects of stress responses, encompassing toxin-antitoxin regulation, survival under anaerobic  
268 conditions, SOS, heat shock, antibiotic resistance, and cell division reviewed in<sup>32</sup>.

269

270 The SOS response is among the best studied pathways in *E. coli*, inducing DNA repair genes in response  
271 to double strand breaks and stalled replication forks generated by severe DNA damage. Yet, we continue  
272 to unravel new phenotypes controlled by this response. Instead of being directed solely at DNA repair,  
273 the SOS response is turning out to be central for several stressful situations. Similarly, the causes and  
274 impacts of mistranslation also continue to be extensively explored, with new details surfacing each day.  
275 At the moment, we cannot determine whether mistranslation was co-opted by the DNA damage  
276 response as a trigger, or vice-versa. Irrespective of which response evolved first, it is clear that diverse  
277 cellular mechanisms are linked in unexpected ways, co-ordinating the cellular response to multiple  
278 stresses. While these phenomena are independently well studied, we can now connect them using a  
279 single effector molecule, Lon protease. Our study raises the question of whether such novel links could  
280 themselves be evolving in different directions, leading to cross talk between mutation-independent  
281 phenotypic variation and genetic change in response to stress.

282

## 283 **ACKNOWLEDGEMENTS**

284 We thank Anjana Badrinarayanan, Sunil Laxman, and members of the Agashe lab for discussion and  
285 critical comments on the manuscript. We thank Awadhesh Pandit and Tejali Naik for help with whole  
286 genome sequencing at the NCBS sequencing facility; Dipankar Chatterjee and Kuldeep Gupta (Indian



287 Institute of Science, Bangalore) for access to and help with their Biolog machine; Kurt Fredrick (Ohio  
288 State University) for the luciferase assay system; and Jayaraman Gowrishankar and Nalini Raghunathan  
289 (Centre for DNA Fingerprinting and Diagnostics, Hyderabad) for the *lexA3* allele. We acknowledge  
290 funding and support from the Wellcome Trust-DBT India Alliance (grant IA/E/14/1/501771 to LS and  
291 grant IA/I/17/1/503091 to DA); the Indian Council for Medical Research (ICMR fellowship 3/1/3/JRF-  
292 2015 to PR); the Council for Scientific and Industrial research (CSIR research grant 37(1629)/14/EMR-  
293 II to DA); and the National Centre for Biological Sciences (NCBS-TIFR).

294

## 295 AUTHOR CONTRIBUTIONS

296 LS and DA conceived the project; LS and DA designed experiments; LS and PR conducted  
297 experiments; LS and DA analysed data; LS and DA wrote the manuscript.

298

## 299 REFERENCES

- 300 1 Mordret, E. *et al.* Systematic detection of amino acid substitutions in proteome reveals a  
301 mechanistic basis of ribosome errors. *bioRxiv* (2018).
- 302 2 Ellis, N. & Gallant, J. An estimate of the global error frequency in translation. *Mol Gen Genet*  
303 **188**, 169-172 (1982).
- 304 3 Ruan, B. *et al.* Quality control despite mistranslation caused by an ambiguous genetic code.  
305 *Proceedings of the National Academy of Sciences of the United States of America* **105**, 16502-  
306 16507, doi:10.1073/pnas.0809179105 (2008).
- 307 4 Jakubowski, H. & Goldman, E. Editing of errors in selection of amino acids for protein  
308 synthesis. *Microbiol Rev* **56**, 412-429 (1992).
- 309 5 Zaher, H. S. & Green, R. Fidelity at the molecular level: lessons from protein synthesis. *Cell*  
310 **136**, 746-762, doi:10.1016/j.cell.2009.01.036 (2009).
- 311 6 Netzer, N. *et al.* Innate immune and chemically triggered oxidative stress modifies translational  
312 fidelity. *Nature* **462**, 522-526, doi:10.1038/nature08576 (2009).
- 313 7 Mohler, K. & Ibba, M. Translational fidelity and mistranslation in the cellular response to  
314 stress. *Nat Microbiol* **2**, 17117, doi:10.1038/nmicrobiol.2017.117 (2017).
- 315 8 Javid, B. *et al.* Mycobacterial mistranslation is necessary and sufficient for rifampicin  
316 phenotypic resistance. *Proceedings of the National Academy of Sciences of the United States*  
317 *of America* **111**, 1132-1137, doi:10.1073/pnas.1317580111 (2014).
- 318 9 Woese, C. R. On the evolution of the genetic code. *Proceedings of the National Academy of*  
319 *Sciences of the United States of America* **54**, 1546-1552 (1965).
- 320 10 Moghal, A., Mohler, K. & Ibba, M. Mistranslation of the genetic code. *FEBS Lett* **588**, 4305-  
321 4310, doi:10.1016/j.febslet.2014.08.035 (2014).
- 322 11 Schwartz, M. H., Waldbauer, J. R., Zhang, L. & Pan, T. Global tRNA misacylation induced by  
323 anaerobiosis and antibiotic exposure broadly increases stress resistance in *Escherichia coli*.  
324 *Nucleic acids research*, doi:10.1093/nar/gkw856 (2016).
- 325 12 Jones, T. E., Alexander, R. W. & Pan, T. Misacylation of specific nonmethionyl tRNAs by a  
326 bacterial methionyl-tRNA synthetase. *Proceedings of the National Academy of Sciences of the*  
327 *United States of America* **108**, 6933-6938, doi:10.1073/pnas.1019033108 (2011).
- 328 13 Ribas de Pouplana, L., Santos, M. A., Zhu, J. H., Farabaugh, P. J. & Javid, B. Protein  
329 mistranslation: friend or foe? *Trends Biochem Sci* **39**, 355-362, doi:10.1016/j.tibs.2014.06.002  
330 (2014).
- 331 14 Samhita, L., Shetty, S. & Varshney, U. Unconventional initiator tRNAs sustain *Escherichia*  
332 *coli*. *Proceedings of the National Academy of Sciences of the United States of America* **109**,  
333 13058-13063, doi:10.1073/pnas.1207868109 (2012).

- 334 15 Kramer, E. B. & Farabaugh, P. J. The frequency of translational misreading errors in *E. coli* is  
335 largely determined by tRNA competition. *RNA* **13**, 87-96, doi:10.1261/rna.294907 (2007).
- 336 16 Samhita, L., Virumae, K., Remme, J. & Varshney, U. Initiation with elongator tRNAs. *Journal*  
337 *of bacteriology* **195**, 4202-4209, doi:10.1128/JB.00637-13 (2013).
- 338 17 Dittmar, K. A., Sorensen, M. A., Elf, J., Ehrenberg, M. & Pan, T. Selective charging of tRNA  
339 isoacceptors induced by amino-acid starvation. *EMBO Rep* **6**, 151-157,  
340 doi:10.1038/sj.embor.7400341 (2005).
- 341 18 Svenningsen, S. L., Kongstad, M., Stenum, T. S., Munoz-Gomez, A. J. & Sorensen, M. A.  
342 Transfer RNA is highly unstable during early amino acid starvation in *Escherichia coli*. *Nucleic*  
343 *acids research* **45**, 793-804, doi:10.1093/nar/gkw1169 (2017).
- 344 19 Zhong, J. *et al.* Transfer RNAs Mediate the Rapid Adaptation of *Escherichia coli* to Oxidative  
345 Stress. *PLoS genetics* **11**, e1005302, doi:10.1371/journal.pgen.1005302 (2015).
- 346 20 Gualerzi, C. O. & Pon, C. L. Initiation of mRNA translation in bacteria: structural and dynamic  
347 aspects. *Cell Mol Life Sci* **72**, 4341-4367, doi:10.1007/s00018-015-2010-3 (2015).
- 348 21 Nagase, T., Ishii, S. & Imamoto, F. Differential transcriptional control of the two tRNA(fMet)  
349 genes of *Escherichia coli* K-12. *Gene* **67**, 49-57 (1988).
- 350 22 Winther, K. S. & Gerdes, K. Enteric virulence associated protein VapC inhibits translation by  
351 cleavage of initiator tRNA. *Proceedings of the National Academy of Sciences of the United*  
352 *States of America* **108**, 7403-7407, doi:10.1073/pnas.1019587108 (2011).
- 353 23 Watanabe, K. *et al.* Degradation of initiator tRNA<sup>Met</sup> by Xrn1/2 via its accumulation in the  
354 nucleus of heat-treated HeLa cells. *Nucleic acids research* **41**, 4671-4685,  
355 doi:10.1093/nar/gkt153 (2013).
- 356 24 Bochner, B. R., Gadzinski, P. & Panomitros, E. Phenotype microarrays for high-throughput  
357 phenotypic testing and assay of gene function. *Genome Res* **11**, 1246-1255,  
358 doi:10.1101/gr.186501 (2001).
- 359 25 Fan, Y. *et al.* Protein mistranslation protects bacteria against oxidative stress. *Nucleic acids*  
360 *research* **43**, 1740-1748, doi:10.1093/nar/gku1404 (2015).
- 361 26 Karkhanis, V. A., Mascarenhas, A. P. & Martinis, S. A. Amino acid toxicities of *Escherichia*  
362 *coli* that are prevented by leucyl-tRNA synthetase amino acid editing. *Journal of bacteriology*  
363 **189**, 8765-8768, doi:10.1128/JB.01215-07 (2007).
- 364 27 Michel, B. After 30 years of study, the bacterial SOS response still surprises us. *PLoS biology*  
365 **3**, e255, doi:10.1371/journal.pbio.0030255 (2005).
- 366 28 Little, J. W. & Harper, J. E. Identification of the *lexA* gene product of *Escherichia coli* K-12.  
367 *Proceedings of the National Academy of Sciences of the United States of America* **76**, 6147-  
368 6151 (1979).
- 369 29 Radman, M. SOS repair hypothesis: phenomenology of an inducible DNA repair which is  
370 accompanied by mutagenesis. *Basic Life Sci* **5A**, 355-367 (1975).
- 371 30 Uranga, L. A., Reyes, E. D., Patidar, P. L., Redman, L. N. & Lusetti, S. L. The cohesin-like  
372 RecN protein stimulates RecA-mediated recombinational repair of DNA double-strand breaks.  
373 *Nat Commun* **8**, 15282, doi:10.1038/ncomms15282 (2017).
- 374 31 Breidenstein, E. B., Bains, M. & Hancock, R. E. Involvement of the Lon protease in the SOS  
375 response triggered by ciprofloxacin in *Pseudomonas aeruginosa* PAO1. *Antimicrobial agents*  
376 *and chemotherapy* **56**, 2879-2887, doi:10.1128/AAC.06014-11 (2012).
- 377 32 Tsilibaris, V., Maenhaut-Michel, G. & Van Melderen, L. Biological roles of the Lon ATP-  
378 dependent protease. *Res Microbiol* **157**, 701-713, doi:10.1016/j.resmic.2006.05.004 (2006).
- 379 33 Dorr, T., Vulic, M. & Lewis, K. Ciprofloxacin causes persister formation by inducing the TisB  
380 toxin in *Escherichia coli*. *PLoS biology* **8**, e1000317, doi:10.1371/journal.pbio.1000317 (2010).
- 381 34 Yaakov, G., Lerner, D., Bentele, K., Steinberger, J. & Barkai, N. Coupling phenotypic  
382 persistence to DNA damage increases genetic diversity in severe stress. *Nat Ecol Evol* **1**, 16,  
383 doi:10.1038/s41559-016-0016 (2017).
- 384 35 Bacher, J. M. & Schimmel, P. An editing-defective aminoacyl-tRNA synthetase is mutagenic  
385 in aging bacteria via the SOS response. *Proceedings of the National Academy of Sciences of*  
386 *the United States of America* **104**, 1907-1912, doi:10.1073/pnas.0610835104 (2007).
- 387 36 Yanagida, H. *et al.* The Evolutionary Potential of Phenotypic Mutations. *PLoS genetics* **11**,  
388 e1005445, doi:10.1371/journal.pgen.1005445 (2015).

- 389 37 Cowen, L. E. & Lindquist, S. Hsp90 potentiates the rapid evolution of new traits: drug  
390 resistance in diverse fungi. *Science* **309**, 2185-2189, doi:10.1126/science.1118370 (2005).
- 391 38 Halfmann, R. *et al.* Prions are a common mechanism for phenotypic inheritance in wild yeasts.  
392 *Nature* **482**, 363-368, doi:10.1038/nature10875 (2012).
- 393 39 Drummond, D. A. & Wilke, C. O. The evolutionary consequences of erroneous protein  
394 synthesis. *Nat Rev Genet* **10**, 715-724, doi:10.1038/nrg2662 (2009).
- 395 40 Govers, S. K., Mortier, J., Adam, A. & Aertsen, A. Protein aggregates encode epigenetic  
396 memory of stressful encounters in individual *Escherichia coli* cells. *PLoS biology* **16**,  
397 e2003853, doi:10.1371/journal.pbio.2003853 (2018).
- 398 41 Hoffman, K. S., Berg, M. D., Shilton, B. H., Brandl, C. J. & O'Donoghue, P. Genetic selection  
399 for mistranslation rescues a defective co-chaperone in yeast. *Nucleic acids research* **45**, 3407-  
400 3421, doi:10.1093/nar/gkw1021 (2017).
- 401 42 Malik, M., Capecci, J. & Drlica, K. Lon protease is essential for paradoxical survival of  
402 *Escherichia coli* exposed to high concentrations of quinolone. *Antimicrobial agents and*  
403 *chemotherapy* **53**, 3103-3105, doi:10.1128/AAC.00019-09 (2009).
- 404 43 Yamaguchi, Y., Tomoyasu, T., Takaya, A., Morioka, M. & Yamamoto, T. Effects of disruption  
405 of heat shock genes on susceptibility of *Escherichia coli* to fluoroquinolones. *BMC Microbiol*  
406 **3**, 16, doi:10.1186/1471-2180-3-16 (2003).
- 407 44 van der Veen, S. *et al.* The heat-shock response of *Listeria monocytogenes* comprises genes  
408 involved in heat shock, cell division, cell wall synthesis, and the SOS response. *Microbiology*  
409 **153**, 3593-3607, doi:10.1099/mic.0.2007/006361-0 (2007).
- 410 45 Layton, J. C. & Foster, P. L. Error-prone DNA polymerase IV is regulated by the heat shock  
411 chaperone GroE in *Escherichia coli*. *Journal of bacteriology* **187**, 449-457,  
412 doi:10.1128/JB.187.2.449-457.2005 (2005).

413

414

415 **FIGURES**

416

417 **Figure 1. Mistranslation confers resistance to DNA damage by increasing early survival.** (a)

418 Survival of WT and Mutant mid log phase cultures ( $OD_{600nm} \sim 0.6$ ,  $n=9$ ) exposed to  $20 \text{ J/m}^2$  of UV-C  
419 radiation for 5 s. The plot shows mean % survival relative to the number of colonies on a non-irradiated

420 control plate. Mann-Whitney U test, Mutant>WT,  $U=9.5$ ,  $P=0.0046$  (b) Time course of survival (viable

421 counts) of mid log phase cultures of WT and Mutant ( $n=4$ ) treated with 5 mM hydrogen peroxide. At 3

422 h, Mutant>WT, Mann-Whitney U test,  $U=0$ ,  $P=0.029$  (c) Resistance of WT and Mutant mid log phase

423 cultures inoculated from single colonies ( $n=6$ ), pulsed with 20 ng/mL ciprofloxacin (Cip) for 1 h, and

424 plated on LB agar plates with vs. without 50 ng/mL Cip (Cip50). The plot shows the average proportion

425 of resistant colonies relative to total viable counts. Mann-Whitney U test,  $U=0$ ,  $P=0.002$  (d) Early

426 survival (tolerance) of WT, mistranslating and hyper-accurate strains treated with Cip50 for 2 h, from

427 mid log phase cultures inoculated from single colonies ( $n=3$ ) treated with Cip50 for 2 h. We estimated

428 viable counts before and after exposure. The plot shows mean % survival in each case. t tests:

429 Mutant>WT,  $t=6.13$ ,  $P=0.02$ ; WT(canavanine)>WT,  $t=6.1$ ,  $P=0.005$ ; WT(norleucine)>WT,  $t=9.6$ ,

430  $P=0.002$ ; WT(hyper-accurate) vs. WT, ns,  $t=2.3$ ,  $P=0.08$ ; Mutant(hyper-accurate)<Mutant,  $t=6.2$ ,

431  $P=0.02$  (e) Schematic of the proposed model of mistranslation leading to increased sampling of

432 beneficial mutations via enhancement of early survival. (f) Resistance of WT, mistranslating and hyper-

433 accurate strains to Cip50, from mid log phase cultures inoculated from single colonies ( $n=6$ ), pulsed

434 with Cip20 for 1 h, and plated on Cip50 LB agar. The plot shows the mean proportion of resistant

435 colonies relative to total viable counts. Mann-Whitney U tests: Mutant>WT:  $U=1$ ,  $P=0.0043$ ;

436 WT(canavanine)>WT:  $U=1$ ,  $P=0.0043$ ; WT(norleucine)>WT:  $U=0$ ,  $P=0.0022$ ; WT(hyper-

437 accurate)<WT:  $U=0$ ,  $P=0.0022$ ; Mutant(hyper- accurate)<Mutant:  $U=0$ ,  $P=0.0022$ ; Mutant(hyper-

438 accurate)<WT:  $U=0$ ,  $P=0.0022$ . Asterisks indicate a significant difference.

439

440

441

442

443

444

445

446

447

448

449

450

451

452

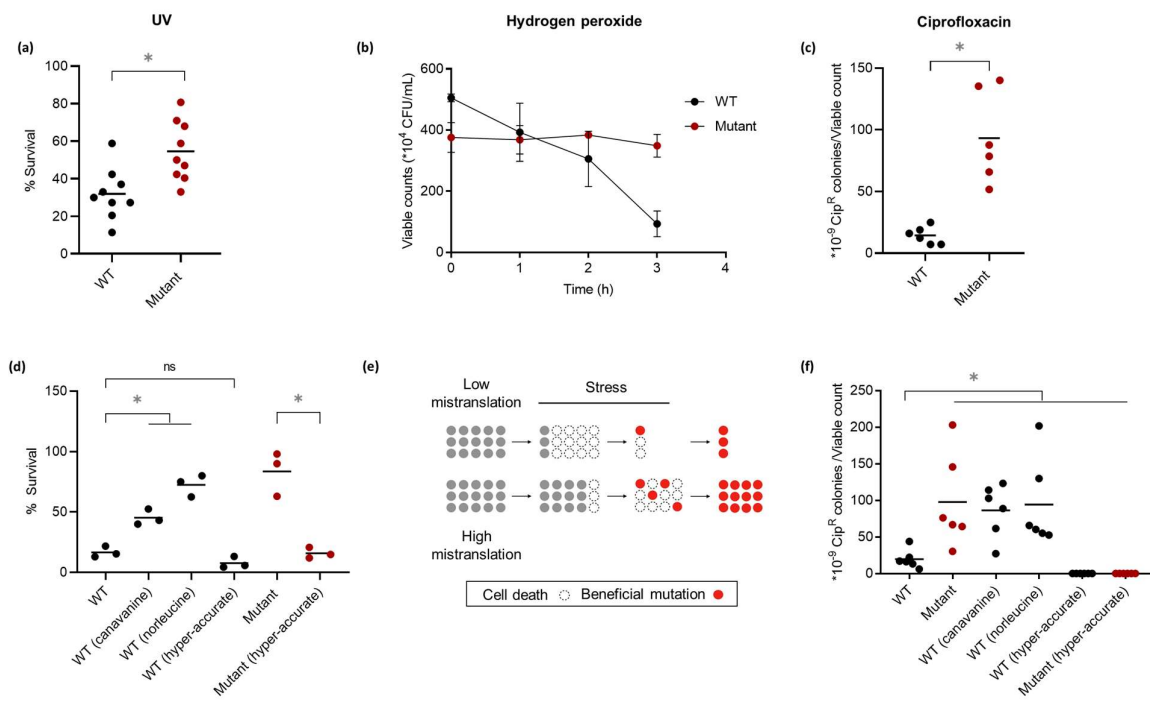

453

454

455

456

457 **Figure 2. Mistranslation mediates ciprofloxacin resistance via the SOS response.** (a) Schematic of  
458 the SOS response in *E. coli* (b) Survival of WT and Mutant mid-log phase cultures ( $OD_{600nm} \sim 0.6$ ) from  
459 single colonies ( $n=6$ ) pulsed with 20 ng/mL ciprofloxacin (Cip20) for 1 h and plated on LB agar with  
460 vs. without 50 ng/mL Cip (Cip50). The plot shows the mean proportion of resistant colonies relative to  
461 total viable counts. SOS was inactivated using the *lexA3* allele. Mann-Whitney U test: Mutant>WT,  
462  $U=1$ ,  $P=0.0043$ ; WT(inactive SOS)<WT,  $U=0$ ,  $P=0.0022$ ; Mutant(inactive SOS)<Mutant,  $U=0$ ,  
463  $P=0.0022$ ; WT $\Delta recN$ <WT,  $U=0$ ,  $P=0.0022$ ; Mutant $\Delta recN$ <Mutant,  $U=0$ ,  $P=0.0022$  (c) A  
464 representative blot showing RecA protein levels from mid log phase cultures of WT and mistranslating  
465 strains ( $n=3$ ). Quantification of mean blot band/total protein is represented in arbitrary units, relative to  
466 WT. Paired t tests: WT vs. Mutant, ns,  $t=3.5$ ,  $P=0.07$ ; WT(canavanine) >WT,  $t=5.1$ ,  $P=0.03$ ; WT vs  
467 WT(norleucine), ns,  $t=2.2$ ,  $P=0.1$  (d) A representative blot showing LexA protein levels from mid log  
468 phase cultures of WT and mistranslating strains ( $n=3$ ). Quantification of mean blot band/total protein  
469 is represented in arbitrary units, relative to WT. Paired t tests: Mutant<WT,  $t=8.7$ ,  $P=0.01$ ;  
470 WT(canavanine)<WT,  $t=29.6$ ,  $P<0.0001$ ; WT vs WT(norleucine), ns,  $t=3.4$ ,  $P=0.07$ ; WT(hyper-  
471 accurate)>WT,  $t=12.4$ ,  $P=0.006$ ; Mutant(hyper-accurate)> Mutant,  $t=10.4$ ,  $P=0.009$  (e) Time course of  
472 LexA degradation from 0 to 50 min post exposure to Cip20. One blot and bands normalised to total  
473 protein are shown here; for more experimental blocks, see Fig. S6 (f) Schematic of the proposed model  
474 of the state of WT and mistranslating strains with respect to the SOS activation threshold. Asterisks  
475 indicate a significant difference between strains.

476

477

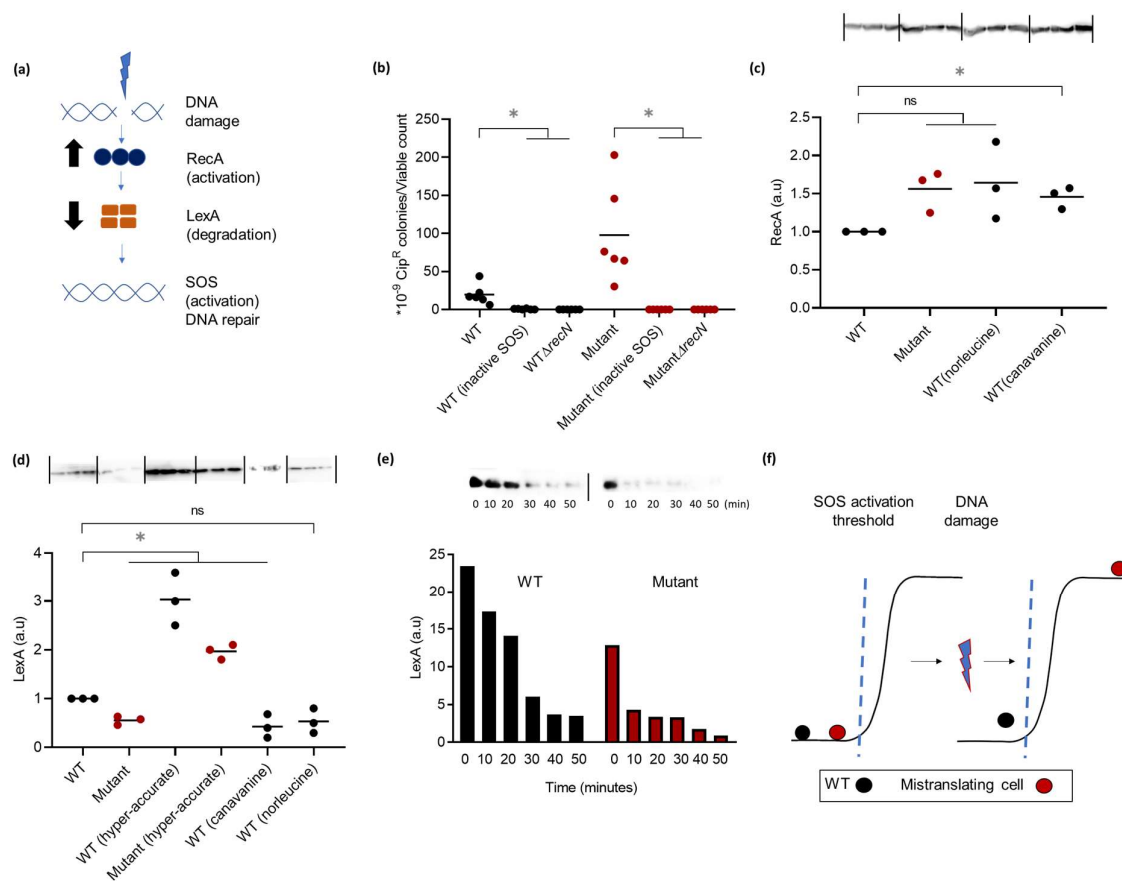

478

479

480

481

482

483

484

485

486

487

488

489

490

491

492

493

494





514 **Figure 4. Mistranslation-induced SOS response enhances survival in other stresses.** (a) Survival  
 515 of WT and Mutant mid log phase cultures ( $OD_{600nm} \sim 0.6$ ) grown overnight at 37°C from single colonies  
 516 ( $n=4$ ), sub-cultured and grown at 37°C or 42°C (to induce the heat shock response while cells entered  
 517 log phase) for 3.5 hours, and plated on LB agar with vs. without 50 ng/mL Cip (Cip50). The plot shows  
 518 the mean proportion of resistant colonies relative to total viable counts. Mann-Whitney tests:  
 519 WT(42°C)>WT(37°C),  $U=0$ ,  $P=0.0286$ ; Mutant(42°C)>Mutant(37°C),  $U=0$ ,  $P=0.0286$  (b) Total viable  
 520 counts of various strains at 0, 12 and 24 h after exposure to 42° C. SOS was inactivated using the *lexA3*  
 521 allele. At 24h, Mann-Whitney tests: Mutant>WT,  $U=0$ ,  $P=0.0286$ ; Mutant(inactive SOS) vs. WT, ns,  
 522  $U=4.5$ ,  $P=0.4$ ; Mutant(hyper-accurate) vs. WT, ns,  $U=8$ ,  $P>0.99$  (c) LexA levels from mid log phase  
 523 cultures ( $n=3$ ) grown at 42°C for 12 h. SOS was inactivated using the *lexA3* allele. Quantification of  
 524 mean blot band/total protein is shown in arbitrary units relative to WT. Paired t test, Mutant<WT,  $t=5.3$ ,  
 525  $P=0.03$ . Asterisks indicate a significant difference between strains.

526  
 527

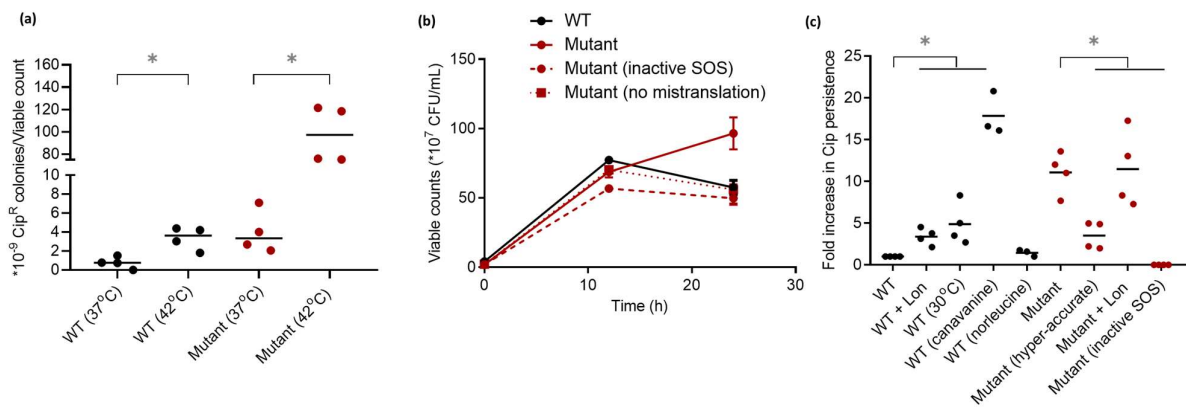

528  
 529

530 **Figure 5. Proposed model for stress resistance mediated by faster SOS activation in**  
531 **mistranslating strains.**

532

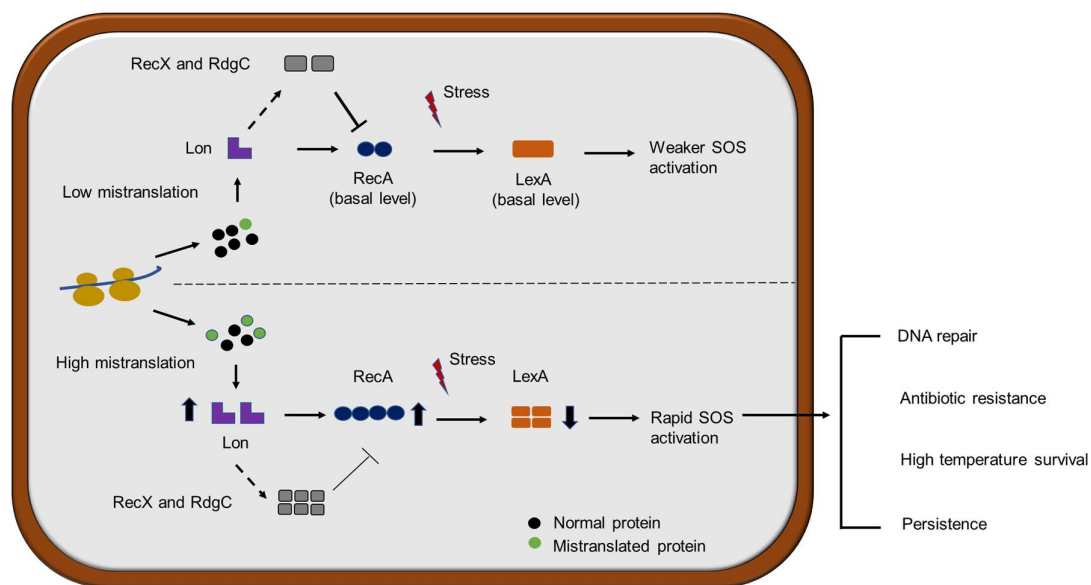

Source: http://biorxiv.org/content/10.1101/650846v1.full.pdf
